# Supplementary material for: Microbiomic and Metabolomic Analyses Unveil the Protective Effect of Saffron in a Mouse Colitis Model
Source: MDPI journal article supplement (doi:10.3390/cimb45070351), 2023-06-30
Supplement: s1 [file s1]

## **Supplementary information**

Table S1: Stool metabolite comparison in DSS+SFE group (n=5 each) at two time points (day 0 and day 10).

| <b>BinBase name</b>             | <b>DSS+SFE 10 vs DSS+SFE 0 Log2-Fold-change</b> | <b>Treated day 10 vs day 0 P-value</b> | <b>Treated day 10 vs day 0 FDR</b> |
|---------------------------------|-------------------------------------------------|----------------------------------------|------------------------------------|
| 1-monostearin                   | 2.015                                           | 0.010                                  | 0.028                              |
| 1,5-anhydroglucitol             | 3.320                                           | 0.000                                  | 0.001                              |
| 2-aminobutyric acid             | 2.821                                           | 0.000                                  | 0.000                              |
| 2-deoxypentitol                 | 2.062                                           | 0.000                                  | 0.001                              |
| 2-deoxytetronic acid            | 1.016                                           | 0.023                                  | 0.055                              |
| 2-hydroxybutanoic acid          | 4.861                                           | 0.000                                  | 0.000                              |
| 2-hydroxyglutaric acid          | 0.819                                           | 0.022                                  | 0.053                              |
| 2-hydroxyhexanoic acid          | 4.944                                           | 0.000                                  | 0.000                              |
| 2-monoolein                     | -3.887                                          | 0.002                                  | 0.007                              |
| 2'-deoxyguanosine               | -2.183                                          | 0.006                                  | 0.020                              |
| 3-aminoisobutyric acid          | 1.364                                           | 0.007                                  | 0.021                              |
| 3-epicholic acid                | -2.052                                          | 0.007                                  | 0.022                              |
| 3-hydroxy-3-methylglutaric acid | 2.975                                           | 0.000                                  | 0.000                              |
| 3-hydroxybutyric acid           | 2.810                                           | 0.000                                  | 0.000                              |
| 3-phenyllactic acid             | 3.883                                           | 0.000                                  | 0.000                              |
| 3,4-dihydroxyphenylacetic acid  | -2.410                                          | 0.001                                  | 0.003                              |
| 4-aminobutyric acid             | 2.848                                           | 0.018                                  | 0.046                              |
| 4-hydroxybenzoic acid           | 1.515                                           | 0.005                                  | 0.015                              |
| 4-hydroxybutyric acid           | 3.576                                           | 0.000                                  | 0.000                              |
| 4-pyridoxic acid                | -1.051                                          | 0.011                                  | 0.031                              |
| 5-aminovaleric acid             | 1.880                                           | 0.001                                  | 0.006                              |
| 5-methoxytryptamine             | -1.652                                          | 0.009                                  | 0.027                              |
| aconitic acid                   | 1.609                                           | 0.017                                  | 0.044                              |
| aminomalonate                   | 1.897                                           | 0.009                                  | 0.026                              |
| arachidonic acid                | 3.246                                           | 0.000                                  | 0.001                              |
| beta-gentiobiose                | 2.197                                           | 0.005                                  | 0.018                              |
| cellobiose                      | -1.796                                          | 0.011                                  | 0.032                              |
| chenodeoxycholic acid           | -1.199                                          | 0.008                                  | 0.024                              |
| cholesterol                     | 3.397                                           | 0.000                                  | 0.000                              |
| citramalic acid                 | 3.876                                           | 0.000                                  | 0.002                              |
| conduiritol-beta-epoxide        | 4.549                                           | 0.000                                  | 0.000                              |
| creatinine                      | 2.181                                           | 0.000                                  | 0.001                              |
| cysteine                        | 1.565                                           | 0.006                                  | 0.020                              |
| cystine                         | 3.832                                           | 0.000                                  | 0.000                              |
| daidzein                        | 2.264                                           | 0.000                                  | 0.003                              |
| deoxycholic acid                | -7.352                                          | 0.000                                  | 0.000                              |
| dihydro-3-coumaric acid         | -4.553                                          | 0.000                                  | 0.000                              |
| docosahexaenoic acid            | 1.732                                           | 0.004                                  | 0.015                              |
| erythritol                      | 1.655                                           | 0.003                                  | 0.012                              |
| ferulic acid                    | -1.790                                          | 0.004                                  | 0.014                              |
| fumaric acid                    | 1.939                                           | 0.001                                  | 0.004                              |
| galactinol                      | 1.559                                           | 0.002                                  | 0.010                              |
| gluconic acid                   | 3.454                                           | 0.000                                  | 0.002                              |
| glucose                         | -1.894                                          | 0.003                                  | 0.011                              |

|                        |        |       |       |
|------------------------|--------|-------|-------|
| glutamine              | -1.520 | 0.017 | 0.044 |
| glycerol-3-galactoside | -1.152 | 0.019 | 0.048 |
| glycine                | 1.210  | 0.003 | 0.011 |
| glycolic acid          | 2.514  | 0.000 | 0.000 |
| glycyl tyrosine        | -1.408 | 0.004 | 0.013 |
| guanine                | -5.746 | 0.000 | 0.000 |
| hydrocinnamic acid     | -1.871 | 0.004 | 0.014 |
| hypoxanthine           | -4.625 | 0.000 | 0.001 |
| isothreonic acid       | -1.384 | 0.018 | 0.046 |
| L-DOPA                 | 2.202  | 0.000 | 0.001 |
| lactitol               | -3.038 | 0.000 | 0.000 |
| levoglucosan           | 1.021  | 0.008 | 0.025 |
| lithocholic acid       | -2.028 | 0.000 | 0.003 |
| maleimide              | 1.002  | 0.014 | 0.039 |
| malic acid             | 3.090  | 0.000 | 0.000 |
| malonic acid           | 3.535  | 0.000 | 0.000 |
| myo-inositol           | 2.821  | 0.000 | 0.000 |
| N-acetylglutamate      | -1.182 | 0.007 | 0.023 |
| nicotianamine          | 2.723  | 0.000 | 0.001 |
| O-acetylserine         | 1.253  | 0.011 | 0.032 |
| oleic acid             | -1.947 | 0.003 | 0.010 |
| oxamic acid            | 2.533  | 0.000 | 0.000 |
| palmitoleic acid       | 1.820  | 0.002 | 0.007 |
| parabanic acid         | 2.505  | 0.001 | 0.004 |
| pentitol               | 2.016  | 0.000 | 0.002 |
| pentose                | -2.381 | 0.002 | 0.008 |
| phytol                 | -1.587 | 0.012 | 0.032 |
| phytosphingosine       | 2.109  | 0.008 | 0.023 |
| pinitol                | 4.600  | 0.000 | 0.001 |
| piperidone             | 1.594  | 0.001 | 0.003 |
| quinic acid            | 1.991  | 0.000 | 0.003 |
| quinolinic acid        | 1.530  | 0.003 | 0.012 |
| raffinose              | 1.848  | 0.018 | 0.046 |
| ribose                 | -1.936 | 0.007 | 0.023 |
| saccharic acid         | 2.407  | 0.000 | 0.001 |
| saccharopine           | -1.474 | 0.002 | 0.007 |
| sarcosine              | 1.130  | 0.008 | 0.025 |
| sophorose              | -2.059 | 0.016 | 0.042 |
| squalene               | 1.139  | 0.008 | 0.023 |
| tagatose               | 1.258  | 0.006 | 0.020 |
| tocopherol alpha-      | -2.128 | 0.004 | 0.015 |
| tyrosine               | -1.646 | 0.001 | 0.005 |
| uric acid              | 4.088  | 0.000 | 0.000 |
| urocanic acid          | 1.057  | 0.006 | 0.020 |
| vanillic acid          | 2.460  | 0.000 | 0.001 |
| xanthosine             | 2.255  | 0.000 | 0.003 |
| xylose                 | -2.302 | 0.001 | 0.003 |
| zymosterol             | 1.504  | 0.002 | 0.009 |

\*All the unidentified metabolites were excluded in this table.

At day 0 these are baseline values but at day 10 the alterations of metabolites are due to effect of DSS+SFE20mg (combine effect of DSS+SFE20mg)

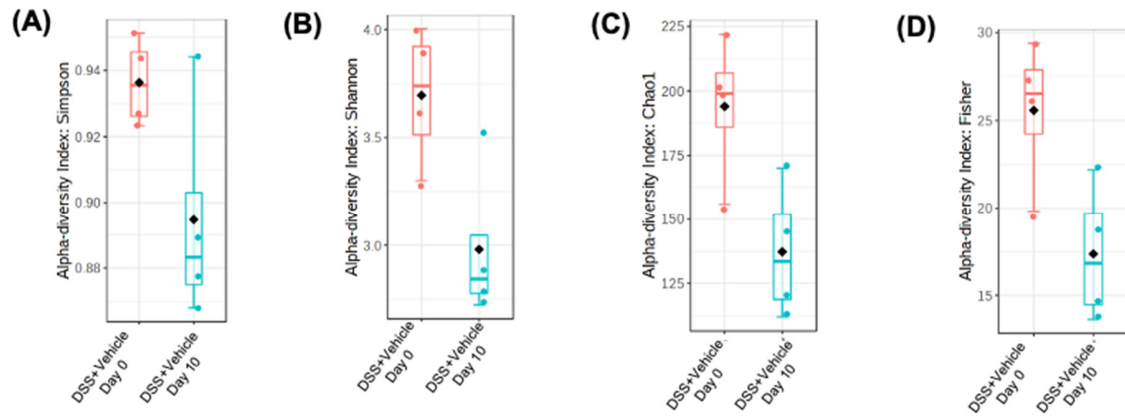

Supplementary Figure S1: Microbial diversity comparison between two timepoints day 0 and day 10 for DSS+Vehicle group. The OTU number representing the bacterial species richness of the microbiota was estimated for alpha diversity using the, A) Simpson (p value:0.087) , B) Shannon index (p value:0.025), C) Chao1 (p value:0.024), D) Fischer (p value: 0.027).

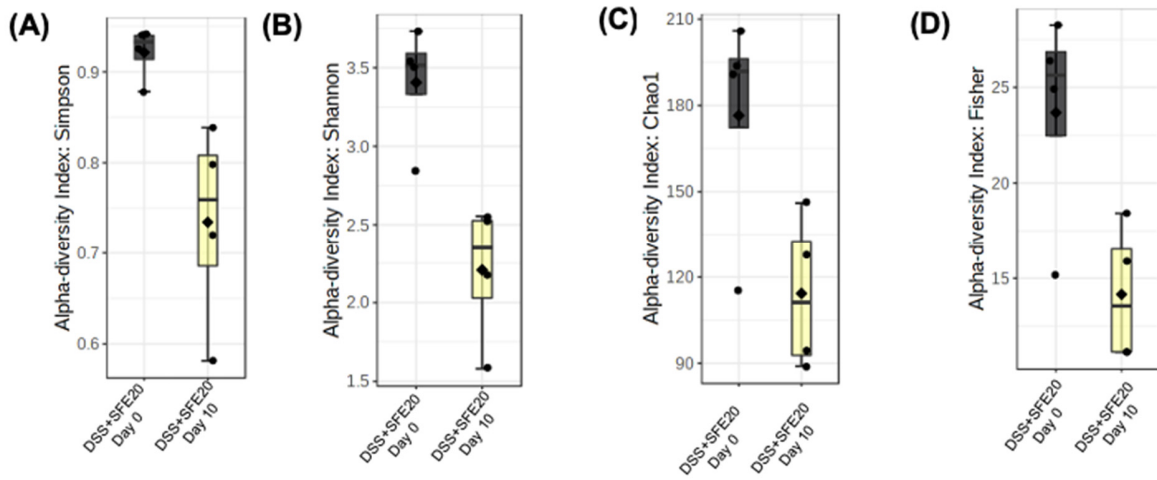

Supplementary Figure S2: Microbial diversity comparison between two timepoints day 0 and day 10 for DSS+SFE20 group. The OTU number representing the bacterial species richness of the microbiota was estimated for alpha diversity using the , A) Simpson (p value:0.041) , B) Shannon index (p value:0.007), C) Chao1 (p value:0.050), D) Fischer (p value: 0.039).
